# Supplementary material
Source: publisher figshare collection journal article supplement (https://future-science-group.figshare.com/ndownloader/files/30807964)
Supplement: Supplementary file 1 [file 30807964]

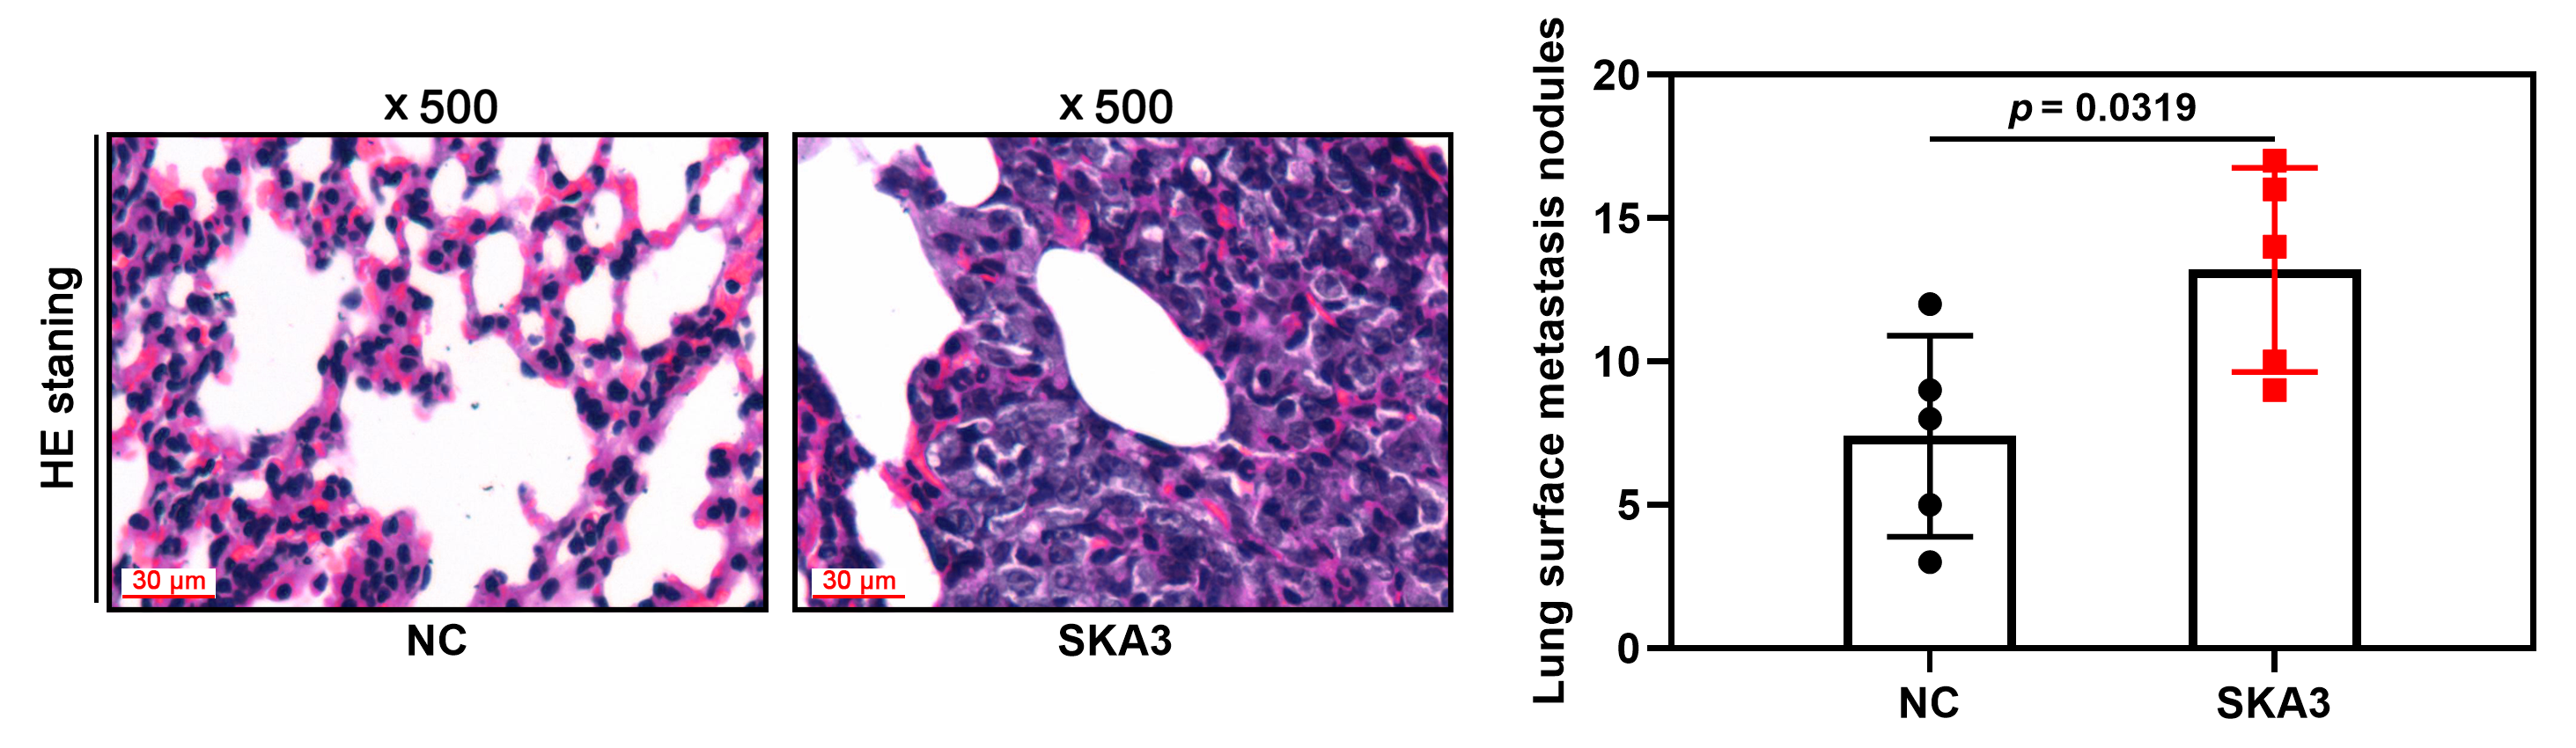


Supplementary Figure 1. The lung metastasis model of A549 cells was used to detect the effects of overexpression of SKA3 on lung metastasis of NSCLC cells.
